## 36 Introduction

37 Many different forms of motor learning were described and studied using various  
38 laboratory-tasks over the past decades (for review see Krakauer et al., 2019). Two main learning  
39 mechanisms are considered to account for most of our motor learning capabilities: error-based  
40 adaptation and reward-based reinforcement learning. Error-based adaptation is driven by sensory-  
41 prediction errors, while reward-based learning is driven by reinforcement of successful actions  
42 (Krakauer and Mazzoni, 2011). While both mechanisms can contribute to learning in any given  
43 task, the constraints of the highly controlled laboratory-tasks common in the field induce the  
44 predominance of one mechanism over the other (Haith and Krakauer, 2013), and show different  
45 neural dynamics associated with the different learning mechanisms (e.g. Uehara et al., 2018; Palidis  
46 et al., 2019).

47 The main neural signatures of voluntary movement and motor learning found in  
48 constrained laboratory tasks are the Beta oscillations (13–30 Hz), which are related to GABAergic  
49 neural activity (Roopun et al., 2006; Yamawaki et al., 2008; Hall et al., 2010, 2011). More  
50 specifically, there is a transient and prominent increase in Beta oscillations magnitude across the  
51 sensorimotor network after cessation of voluntary movement known as post-movement Beta  
52 rebound (PMBR) or post-movement Beta synchronization (Pfurtscheller et al., 1996). In motor  
53 adaptation studies, PMBR over the motor cortex contralateral to the moving hand was reported to  
54 negatively correlate with movement errors, lower errors induced higher PMBR (e.g. Tan et al.,  
55 2014a, 2016; Torrecillos et al., 2015) and therefore PMBR increases over learning. In reward-based  
56 tasks the PMBR shows the opposite trend; e.g., in a force tracking task PMBR decreased with  
57 learning (Kranczioch et al., 2008). Additionally, PMBR is positively correlated with GABA  
58 concentration as measured by magnetic resonance spectroscopy (Gaetz et al., 2011; Cheng et al.,  
59 2017) which also decreases over reward-based learning tasks such as sequence learning in force  
60 tracking (Floyer-Lea et al., 2006) and serial reaction time (Kolasinski et al., 2019).

61 We are now seeking to understand to what extent previous findings in artificial laboratory-  
62 tasks can be validated in a complex, fully-body task people choose to experience in daily life. Here,  
63 we set to study the human brain activity during motor learning in a real-world task using mobile  
64 EEG. We recently introduced a real-world motor-skill learning paradigm in pool table billiards  
65 (Haar et al., 2019). Here, we set to study the human brain activity during motor learning in a real-  
66 world task using mobile EEG. Subjects had to do a pool shot to put the ball in the pocket using full-  
67 body, self-paced movement, with as many preparatory movements as the subject needs for each  
68 shot. We implemented this as a real-world task because we are basically only adding sensors to a  
69 pool table setting. Subjects use the natural tools and setups they normally would, carry out the  
70 natural motor commands, receive the natural somatosensory feedback and experience the same  
71 satisfaction rewards when they put the ball in the pocket. In our pool playing paradigm, as in most

72 everyday motor learning experiences, performance errors were not driven by artificial perturbations  
73 but by the complexity of learning the task (which takes competitive pool players years to master)  
74 and noise in the nervous system (Faisal et al., 2008). We test here the hypothesis whether neural  
75 correlates of motor learning in real-world tasks show features consistent with those in artificial  
76 laboratory tasks. Specifically, we hypothesize that PMBR responses may look different in real-  
77 world tasks, because learning in a real-world paradigm may not be predominantly mediated by a  
78 single specific learning mechanism, such as motor adaptation and its increasing PMBR response  
79 over trials. Moreover, we hypothesise that a far less constrained real-world task, may give human  
80 subjects the freedom to learn in their personally most conducive way, instead of being forced by an  
81 artificial paradigm to explore a single route of leaning: thus we want to test the hypothesis if  
82 different subjects may employ different learning strategies and consequently exhibit different  
83 neural signatures of learning or if all learn the same way.

## 84 **Methods**

85 *Experimental Setup and Design.* 30 right-handed healthy human volunteers (12 women and  
86 18 men, aged  $24 \pm 3$ ) with normal or corrected-to-normal visual acuity participated in the study. The  
87 recruitment criteria were that they played pool/billiards/snooker for leisure fewer than 5 times in  
88 their life, never in the recent 6 months, and had never received any pool game instructions. All  
89 volunteers gave informed consent before participating in the study, and all experimental procedures  
90 were approved by the Imperial College Research Ethics Committee and performed in accordance  
91 with the declaration of Helsinki. The volunteers stood in front of a 5ft pool table (Riley Leisure,  
92 Bristol, UK) with 1 7/8" (48mm diameter) pool balls. Volunteers performed 300 repeated trials  
93 where the cue ball (white) and the target ball (red) were placed in the same locations. We asked  
94 volunteers to shoot the target ball towards the pocket of the far-left corner (Figure 1A). Trials were  
95 split into 6 sets of 50 trials with a short break in-between to allow the subjects to rest a bit and  
96 reduce potential fatigue. Each experimental set (of 50 trials) took 8 to 12 minutes. For the data  
97 analysis, we further split each set into two blocks of 25 trials each, resulting in 12 blocks. During  
98 the entire learning process, we recorded the subjects' brain activity with a wireless EEG headset  
99 (Figure 1B). The balls on the pool table were tracked with a high-speed camera to assess the  
100 subjects' success in the game and to analyse the changes throughout learning, not only in the body  
101 movement and brain activity but also in its outcome – the ball movement (Figure 1C). EEG and  
102 ball motion tracking camera were recorded on the same machine. All signals were time-stamped  
103 by accessing the high precision event timer of the computer and synchronised accordingly.

104 *Balls tracking.* The balls movement on the pool table were tracked with a computer vision  
105 system mounted from the ceiling. The computer vision camera was a Genie Nano C1280 Color  
106 Camera (Teledyne Dalsa, Waterloo, Canada), colour images were recorded with a resolution of

107 752x444 pixels and a frequency of 200Hz. This Ethernet-based camera was controlled via the  
108 Common Vision Blox Management Console (Stemmer Imaging, Puchheim, Germany) and image  
109 videos recorded with our custom software written in C++ based on a template provided by Stemmer  
110 Imaging. Our software captured the high-performance event timer, the camera frames and  
111 converted the images from the camera's proprietary CVB format to the open-source OpenCV  
112 (<https://opencv.org/>) image format for further processing in OpenCV. The video frames were  
113 stored as an uncompressed AVI file to preserve the mapping between pixel changes and timings  
114 and the computer's real-time clock time-stamps were recorded to a text file. Each trial was subject-  
115 paced, so the experimenter observed the subject and hit the spacebar key as an additional trigger  
116 event to the time-stamps text file. This timing data was later used to assist segmentation of the  
117 continuous data stream into trials. The positions of the two pool balls (white cue ball and red target  
118 ball) were calculated from the video recordings offline using custom software written in C++ using  
119 OpenCV. Then, with custom software written in MATLAB (R2017a, The MathWorks, Inc., MA,  
120 USA), we segmented the ball tracking data and extracted the trajectory of the balls in each trial.  
121 For each trial, a 20 x 20 pixels (approx 40 x 40 mm) bounding box was set around the centre of the  
122 48 mm diameter cue ball. The time the centre of the ball left the bounding box was recorded as the  
123 beginning of the cue ball movement. The pixel resolution and frame rate were thus sufficient to  
124 detect movement onset, acceleration and deceleration of the pool balls. The target (red) ball initial  
125 position and its position in the point of its peak velocity were used to calculate the ball movement  
126 angle (relative to a perfectly straight line between the white cue ball and the red target ball). We  
127 subtracted this angle from the centre of the pocket angle (the angle the target ball initial position  
128 and the centre of the pocket relative to the same straight line between the balls) to calculate the  
129 directional error for each shot.

130 *EEG acquisition and preprocessing.* For the first group of 20 subjects, EEG was recorded  
131 at 256Hz using a wireless 14 channel EEG system (Emotiv EPOC+, Emotiv Inc., CA, USA) as we  
132 wanted to demonstrate the feasibility of using a consumer-grade system for free behaviour research.  
133 In order to then validate our results with a research-grade EEG system, we ran another group of 10  
134 subjects the DSI-24 (Wearable Sensing Inc., CA, USA). With this wireless 21 channel EEG system,  
135 EEG was recorded at 300Hz and downsampled to 256Hz to be analysed with the same pipeline as  
136 the first group. Since there was no difference in the outcomes between the different systems (see  
137 results), we analysed them as a single group, except the system comparison analysis. EEG signals  
138 were preprocessed in EEGLAB (<https://sccn.ucsd.edu/eeglab>; Delorme and Makeig, 2004). EEG  
139 signals were first band-pass filtered at 5-35 Hz using a basic FIR filter, and then decomposed into  
140 independent component (IC) and artefact ICs were removed with ADJUST, an EEGLAB plug-in  
141 for automatic artefact detection (Mognon et al., 2011). Following previous PMBR studies in motor  
142 learning (Tan et al., 2014a, 2016; Torrecillos et al., 2015; Alayrangues et al., 2019), all further  
143 analysis was performed on the EEG activity over the motor cortex contralateral to the moving arm.

144 As all subjects were right-handed and the movement during the trial was done almost exclusively  
145 by the right arm (Haar et al., 2019), we focused on the left motor cortex. Following (Alayrangues  
146 et al., 2019) we manually selected for each subject an IC based on its topographies. In order to  
147 validate it with a less subjective approach, we repeated the analysis using a single channel, C3  
148 according to the international 10–20 EEG system, which sits over the left motor cortex. For the  
149 subjects recorded with the Emotiv system C3 channel was interpolated from the recorded channels  
150 with spherical splines using EEGLAB 'eeg\_interp' function. The two approaches yield the same  
151 results, thus, the data reported here is that of the latter. We repeated the analysis over the right  
152 motor cortex (ipsilateral to the moving arm contralateral to the stabilizing arm) using C4 according  
153 to the international 10–20 EEG system. This analysis yields similar results and is reported in the  
154 Supplementary Materials.

155 *EEG time-frequency analysis.* Each block was transformed in the time-frequency domain  
156 by convolution with the complex Morlet wavelets in 1 Hz steps. Event-related EEG power change  
157 was subsequently calculated as the percentage change by log-transforming the raw power data and  
158 then normalizing relative to the average power calculated over the block, as no clear baseline could  
159 be defined during the task (Tan et al., 2014a, 2016; Torrecillos et al., 2015; Alayrangues et al.,  
160 2019), and then subtracting one from the normalized value and multiplying by 100. While this  
161 normalization procedure might be less common than one based on motion-free pre-movement  
162 baseline period, it was used by most of the PMBR motor learning studies mentioned above and  
163 enabled the natural free-behaviour aspect of the task of self-paced movement, with as many  
164 preparatory movements as the subject needs for each shoot, and no go-cues or hold-cues. Event-  
165 related power changes in the Beta band (13–30 Hz) were investigated. Since there was no go cue  
166 and the subject shot when they wanted, the best-defined time point during a trial was the beginning  
167 of the cue ball movement, defined by exiting its bounding box (see *Balls tracking* above). Thus, we  
168 used the ball movement onset to estimate movement offset (which could last few hundred  
169 milliseconds more due to follow through movement) and looked in the following 2 seconds window  
170 for the peak Beta power which should follow the movement termination. The post-movement Beta  
171 rebound (PMBR) was defined as the average normalized power over a 200ms window centred on  
172 the peak of the power after movement termination (Tan et al., 2016). The PMBR was calculated  
173 for each trial before averaging over blocks for further analysis. The time-frequency analysis was  
174 performed with custom software written in MATLAB (R2017a, The MathWorks, Inc., MA, USA).

175 *Multiple groups analysis.* To assessed if there may be multiple groups of subjects with  
176 different PMBR trends we used generative Bayesian modelling to determine in a data-driven way  
177 the structure of the data. We fitted the data with a Gaussian mixture models of one to five  
178 components, allowing us to understand if 1,2,3,4 or 5 distinct groups appeared in the distribution  
179 or not. To select between these 5 models of different complexity we used two information criteria,  
180 the Akaike information criterion (AIC) and its corrected version for small sample size (AICc). AIC

181 estimates the amount of information that is lost while fitting a model and thus can measure the  
182 quality of different models relative to each other. In addition to the Bayesian framework, we  
183 validate this grouping with unsupervised fuzzy c-means (FCM) clustering, tested for two to ten  
184 clusters. FCM assigns a friendship to each data point in each cluster according to its distance from  
185 the cluster's centre, and on iterative process recalculate the clusters' centres and the friendship until  
186 it converges. After convergence, each point is classified into the cluster with which it had the  
187 highest friendship. Following Haar et al. (2015), we used the cluster validity index proposed by  
188 Zhang et al. (2008). This index uses a ratio between a variation within each cluster and a separation  
189 between the fuzzy clusters. The smaller the ratio, the better the clustering.

190 *Behavioural measures of Motor Skill Learning.* We calculated and analysed three know  
191 matrices for motor skill learning: movement complexity, lag-1 autocorrelation, and intertrial  
192 variability. Movement complexity was defined as the number of degrees of freedom used by the  
193 subject as their body move while making the pool shot. For that, we used the manipulative  
194 complexity (Belić and Faisal, 2015) over the full-body kinematics. For the analysis of full-body  
195 kinematics and its complexity measurements during this task see Haar et al. (2019). Briefly, we  
196 applied Principal component analysis (PCA) over the velocity profiles of all body joints and asked  
197 how many PCs are needed to explain the variance. The manipulative complexity quantify  
198 complexity for a given number of PCs on a fixed scale ( $C = 1$  implies that all PCs contribute equally,  
199 and  $C = 0$  if one PC explains all data variability). Lag-1 autocorrelation (ACF(1)) is a lagged  
200 Pearson correlation between a signal to itself. In our case, the signal is the directional error of the  
201 target-ball relative to the pocket in each trial. Since the estimation of autocorrelations from short  
202 time series is fundamentally biased (Kendall, 1954; Marriott and Pope, 1954; van Beers, 2009), we  
203 calculated the ACF(1) over the first and the second halves of the learning session (sets of 150 trials,  
204 blocks 1-6 and 7-12, respectively) and not in each block of 25 trials. Intertrial variability was  
205 defined for each block by the standard deviation over the directional error of the target-ball in all  
206 block's trials. The decay in the intertrial variability was measured from the first block (trials 1-25)  
207 to the learning plateau (trials 201-300).

## 208 **Results**

209 30 right-handed volunteers, with little to no previous experience playing billiards,  
210 performed 300 repeated trials (6 sets of 50 trials each with short breaks in-between) where the cue  
211 ball and target ball were placed in the same locations, and subjects were asked to shoot the target  
212 ball towards the far-left corner pocket (Figure 1A). During the entire learning process, we recorded  
213 the subjects' brain activity with wireless EEG (Figure 1B), and the balls on the pool table were  
214 tracked with a high-speed camera to assess the outcome of each trial (Figure 1C). We divided the  
215 trials into blocks of 25 trials (each experimental set of 50 trials was divided into two blocks to



216 increase the resolution in time). The learning curve showed decay in the directional error of the  
217 target ball (relative to the direction from its origin to the centre of the target pocket) over trials  
218 (Figure 1D).

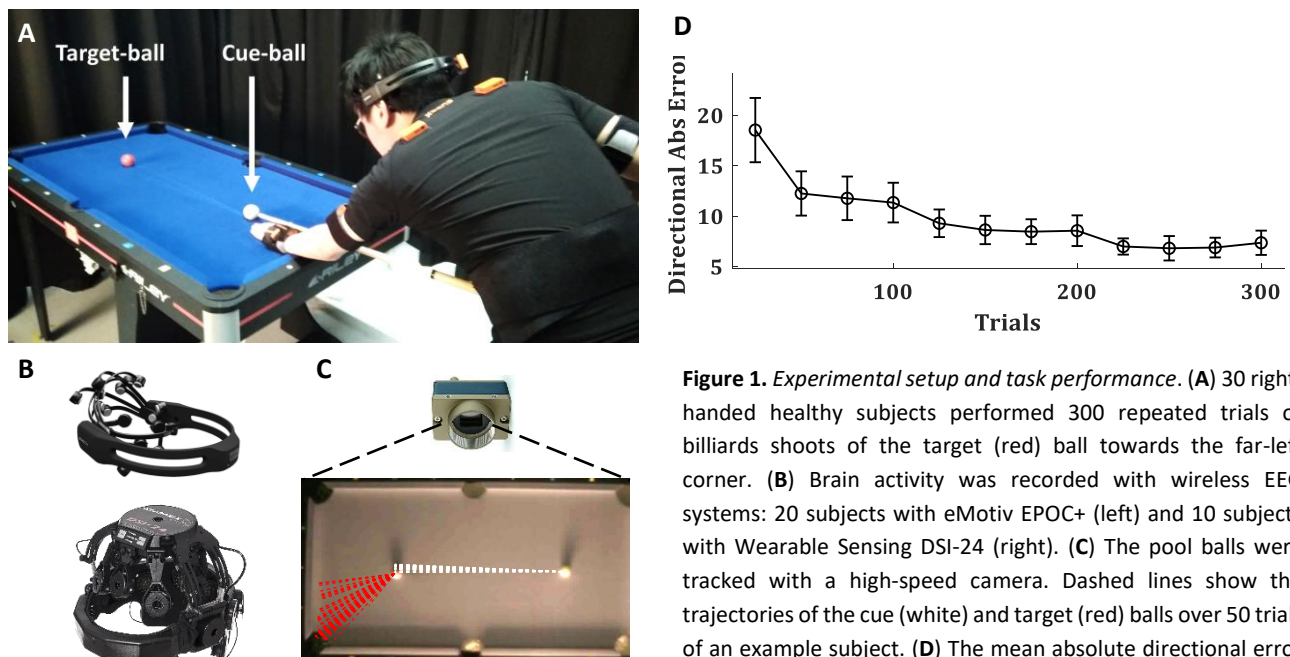

**Figure 1.** *Experimental setup and task performance.* (A) 30 right-handed healthy subjects performed 300 repeated trials of billiards shoots of the target (red) ball towards the far-left corner. (B) Brain activity was recorded with wireless EEG systems: 20 subjects with eMotiv EPOC+ (left) and 10 subjects with Wearable Sensing DSI-24 (right). (C) The pool balls were tracked with a high-speed camera. Dashed lines show the trajectories of the cue (white) and target (red) balls over 50 trials of an example subject. (D) The mean absolute directional error of the target-ball (relative to the direction from its origin to the centre of the target pocket) over blocks of 25 trials, averaged across all subjects, error bars represent SEM across subjects.

219

220 The PMBR, a transient increase in Beta oscillations over the motor cortex after the end of  
221 the movement, was evident in the data (Figure 2A). On average across subjects, there was no clear  
222 trend of PMBR (increase or decrease) over learning (Figure 2B). With a data-driven approach, we  
223 assessed if there may be multiple groups with different PMBR trends that averaging blends away.  
224 We used generative Bayesian modelling to determine in a data-driven way the structure of the data.  
225 We fitted to the PMBR data (a 12-dimensional matrix, one data point per run for each subject) a  
226 Gaussian mixture models of one to five components and used AIC and AICc to select between  
227 these 5 models (see methods). Both information criteria showed that the data followed a bimodal  
228 distribution (Figure 2C).

229 The most meaningful measure for learning is the PMBR correlation with the performance  
230 error, as it accounts for the dependency between this brain signal and the behaviour, and it was  
231 reported to show negative correlations in classic adaptation task consistently across individuals  
232 (e.g. Tan et al., 2016). The subject-by-subject correlation over blocks between the PMBR and the  
233 directional error showed a clear bimodal grouping. While 16 of the 30 subjects showed negative  
234 PMBR-Error correlations (as reported in adaptation studies), the other 14 subjects showed positive  
235 correlations. Again, we used generative Bayesian modelling to determine the structure of the data.  
236 We fitted to the distribution of the PMBR-Error correlations a Gaussian mixture models of one to

237 five components, the information criteria (AIC & AICc) showed that the data followed a clear  
 238 bimodal distribution (Figure 2D). Each mode corresponded to a grouping of subjects with either all  
 239 positive and all negative correlation coefficients (Figure 2E). We note that the opposite signs of the  
 240 correlations reflect opposite dynamics, further justifying a grouping into two distinct groups. This  
 241 validated our findings with the purely data-driven approach on the multidimensional PMBR data.  
 242 Since errors decay over learning, the PMBR-Error correlation was negatively correlated with the  
 243 PMBR dynamic (increase/decrease). Thus, the first group showed a clear trend of PMBR increase  
 244 over learning (linear model fit: F-statistic vs. constant model = 24 p=0.0006), while the second  
 245 group showed a clear trend of PMBR decrease over learning (F vs. constant model = 45.1  
 246 p=0.00005) (Figure 2F). This was validated with a mixed-design ANOVA model with a between-  
 247 subjects factor of the group effect, a within-subjects repeated measures factor of the change over  
 248 blocks, and their interaction. The model yielded a significant interaction ( $F(11)=6.746$  p= 3e-10),  
 249 but no significance for the between- and within-subjects factors ( $F(1)=0.27$  p=0.61 and  $F(11)=$   
 250 1.767 p=0.06, respectively). Thus, for simplicity, we named the groups *PMBR Increasers* and  
 251 *PMBR Decreasers*.

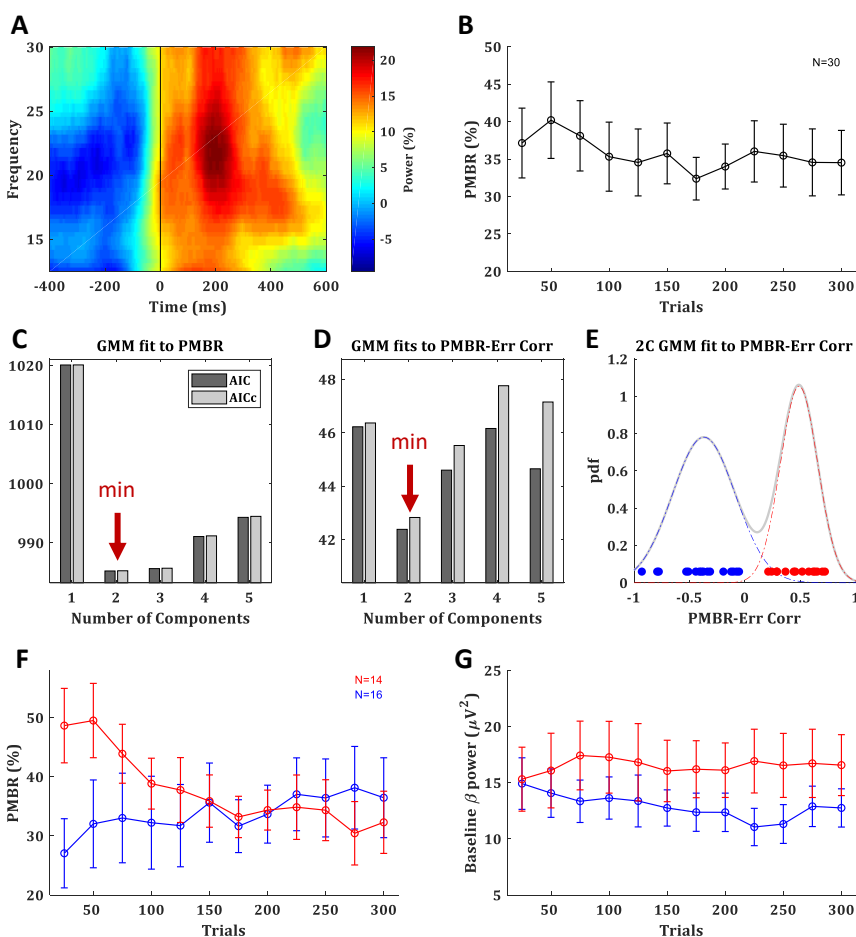

**Figure 2.** *Post-movement beta rebound.* (A) Time-frequency map of a typical subject aligned to movement offset (ball movement onset), obtained by averaging the normalized power over electrode C3. (B) PMBR over blocks (of 25 trials), averaged across all subjects, error bars represent SEM. (C) The information criterions (AIC & AICc) of Gaussian mixture model (GMM) fits with 1 to 5 components to the PMBR data. (D) The information criterions of GMM fits to the PMBR-Error correlations (E) The distribution of subject-by-subject PMBR-Error correlations fitted with two-component GMM (pdf: probability density function). Subjects are color coded based on the two-component model: subjects with negative correlations are in blue (*PMBR Increasers*) and subjects with positive correlations are in red (*PMBR Decreasers*). The grouping was also validated by unsupervised clustering (see main text). (F,G) PMBR (F) and Baseline beta power (G) of the *PMBR Increasers* (blue) and *PMBR Decreasers* (red) over blocks, averaged across all subjects in each groups, error bars represent SEM.

252



253 While we pursued a probabilistic analysis Bayesian framework of data science, to further  
254 validate this grouping we also tried a completely different method. We used unsupervised fuzzy c-  
255 means (FCM) clustering, tested for two to ten clusters using a cluster validity index based on the  
256 ratio between-within cluster variation and between clusters separation (Zhang et al., 2008). The  
257 validity index strictly suggested two clusters in the data, which were the same groups found by the  
258 Gaussian mixture model: the subjects with the positive and the negative PMBR-Error correlation  
259 coefficients. Additionally, since we calculated Beta-power changes as per cent signal change  
260 relative to the average power over the block (see methods), the observed group differences might  
261 be driven by differences in their baselines. However, we found that this was not the case: there was  
262 no real difference in the Beta-power baseline between the groups, in terms of their values and trend  
263 over learning (Figure 2G). There was no significant difference between the groups' Beta-power  
264 baseline in any of the blocks (t-test  $p > 0.076$ ) and not in the change of the Beta-power baseline  
265 between blocks (t-test  $p > 0.58$ ). This was also validated with a mixed-design ANOVA model which  
266 yielded no significant group effect ( $F(1)=1.286$   $p=0.27$ ), change over blocks effect ( $F(11)=0.685$   
267  $p=0.75$ ) or interaction ( $F(11)= 1.169$   $p=0.31$ ). Lastly, we ensured that these groupings were evident  
268 with both EEG systems used in the study. The brain activity of 20 subjects was recorded with  
269 EPOC+ while the other 10 were recorded with DSI-24 (see methods). From the subjects recorded  
270 with the EPOC+ system, 10 subjects were *PMBR Increases* and the other 10 were *PMBR*  
271 *Decreases*. From the subjects recorded with the DSI-24 there were 6 *PMBR Increases* and 4  
272 *PMBR Decreases*. Correspondingly, there was no correlation between the system and the PMBR-  
273 Error correlation (Spearman rank correlation  $r=0.01$   $p=0.97$ ).

274 Based on the EEG data, which suggests two groups of subjects with different PMBR  
275 dynamics, we looked for behavioural signatures in the task performance of different learning  
276 between these groups. In the task performance metric – the target ball directional error – we found  
277 no significant difference between the groups. After learning plateaus, the *PMBR Decreases* seems  
278 slightly more accurate (Figure 3A) and less variable (Figure 3B), though not significantly. Mixed-  
279 design ANOVA model yielded no significant group effect ( $F(1)=0.001$   $p=0.97$ ) or interaction  
280 ( $F(11)= 0.75$   $p=0.69$ ) for the absolute directional error. *PMBR Decreases* seemed to modify their  
281 variability (actively control of the exploration-exploitation trade-off, explicitly or implicitly) to  
282 improve learning, as evidenced by their high variability in the first block and the very steep decrease  
283 towards the second (Figure 3B). Yet, the Mixed-design ANOVA model of the directional  
284 variability yielded no significant group effect ( $F(1)=0.25$   $p=0.62$ ) or interaction ( $F(11)= 1.57$   
285  $p=0.11$ ). The dynamical control of the variability also evident in the trial-to-trial directional  
286 changes, where the *PMBR Decreases* showed much bigger changes over the first 4 blocks (100  
287 trials), therefore using more exploration than the *PMBR Increases* who made smaller changes from  
288 one trial to the next (Figure 3C). Here the Mixed-design ANOVA model yielded close to

289 significance interaction ( $F(11)= 1.76$   $p=0.06$ ), and a t-test over the trial-to-trial directional changes  
 290 in the initial 4 block showed significant group effect ( $p=0.04$ ).

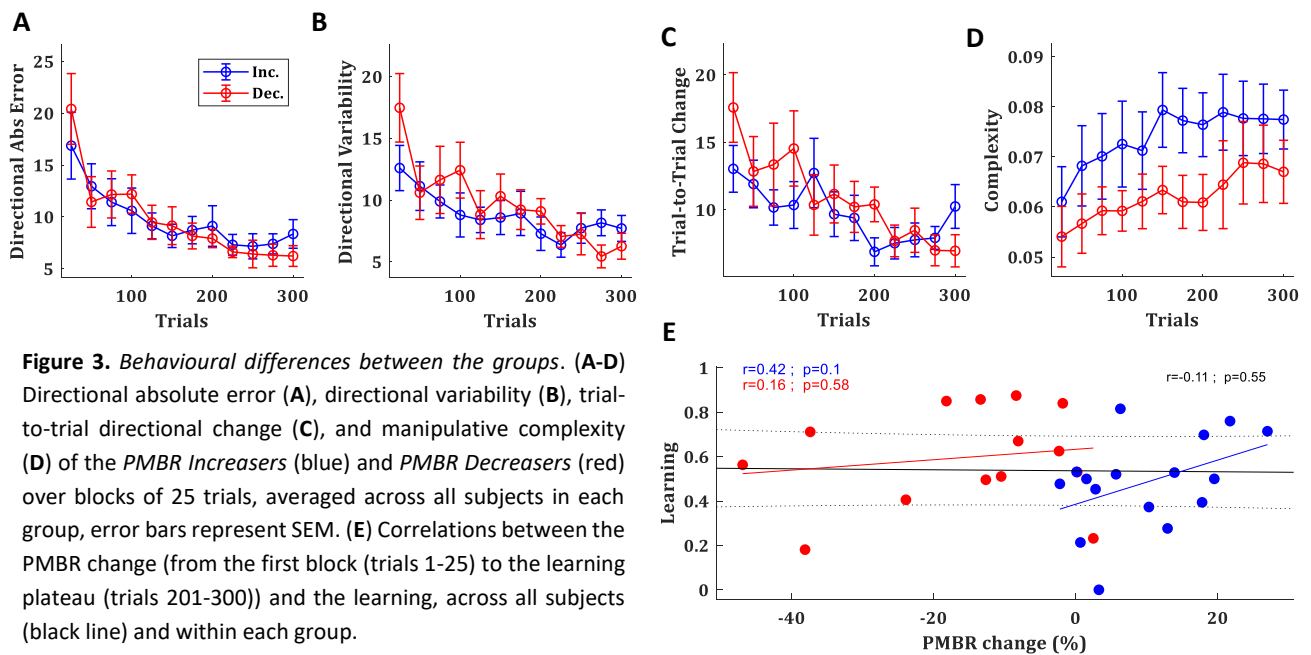

291

292 Learning in the task was defined as the difference between the initial error (over the first  
 293 block: trials 1-25) and the final error (over the learning plateau: trials 201-300) normalised by the  
 294 initial error. *PMBR Decreasers* were on average better learners (mean learning rates were 0.48 and  
 295 0.6 for the *PMBR Increasers* and *PMBR Decreasers* respectively) though the group difference was  
 296 not significant (t-test  $p=0.17$ ). We explored the correlation between learning and the PMBR change  
 297 over blocks (the difference between the final PMBR over the learning plateau: trials 201-300, and  
 298 the initial PMBR over the first block: trials 1-25). Across all subjects, we found no correlation  
 299 between the learning rate and the PMBR change ( $r=-0.11$   $p=0.55$ ). When considering each group  
 300 separately, for the *PMBR Decreasers* there was no clear trend ( $r=0.16$   $p=0.58$ ), but the *PMBR*  
 301 *Increasers* showed a clear trend (though non-significant) of positive correlation of the PMBR  
 302 change with learning ( $r=0.42$   $p=0.1$ , Figure 3E). This means that within the *PMBR Increasers* group  
 303 subjects who had a higher PMBR increase also showed more learning.

304 Next, we set to study metrics of skill-learning which might suggest differences in the  
 305 learning mechanism between the groups. First, we tested the complexity of the movement – i.e. the  
 306 number of degrees of freedom used by the subject – since the use of multiple degrees of freedom  
 307 in the movement is a hallmark of skill learning (Bernstein, 1967). For that we used the manipulative  
 308 complexity (Belić and Faisal, 2015) over the full-body kinematics (see Haar et al. (2019) for the  
 309 analysis of full-body kinematics and its complexity measurements during this task). While the  
 310 manipulative complexity is increasing with learning for all subjects, *PMBR Increasers* tended to

311 have higher complexity in their movement, i.e. use more DoF, throughout the training session (t-  
 312 test  $p < 0.05$ , Figure 3D).

313 Second, we explored the lag-1 autocorrelation (ACF(1)) of the performance measure (in  
 314 our case, the directional error of the target-ball relative to the pocket) which was suggested as an  
 315 index of skill, where close to zero values corresponds to high skill (van Beers et al., 2013). The  
 316 logic behind this measure is that as skill evolve subjects are less susceptible to noise from the  
 317 previous movement. We calculated the ACF(1) over the first and the second halves of the learning  
 318 session (sets of 150 trials, blocks 1-6 and 7-12, respectively). The ACF(1) values of both groups  
 319 were significantly greater than zero during both halves of the session (t-test  $p < 0.01$ ), as expected  
 320 for naive participants (Figure 4A). The initial ACF(1) values of the *PMBR Decreasers* were higher  
 321 than those of the *PMBR Increases*, though not significantly (t-test  $p = 0.06$ ). But, the decay in the  
 322 ACF(1) from the first half of the training session to the second was significantly higher for the  
 323 *PMBR Decreasers* (t-test  $p < 0.01$ , Figure 4B). This was also validated with a mixed-design ANOVA  
 324 model which yielded no significant overall group effect ( $F(1) = 0.119$   $p = 0.73$ ), but a significant  
 325 change over the two halves ( $F(1) = 7.79$   $p = 0.009$ ) and a significant interaction ( $F(1) = 8.393$   
 326  $p = 0.007$ ).

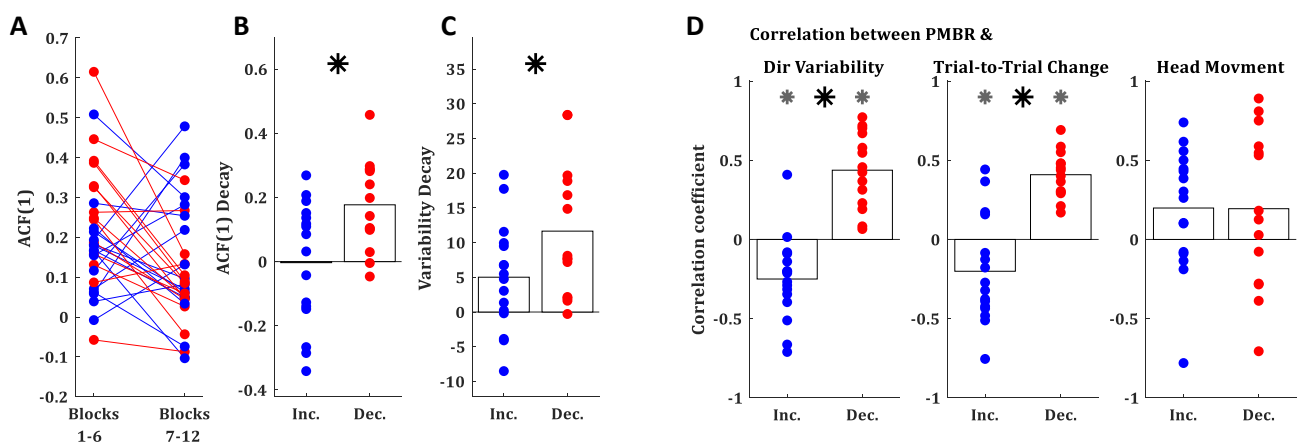

**Figure 4.** Behavioural differences between the groups. (A) Lag-1 autocorrelation of the target ball direction over the first and the second half of the training session (blue: *PMBR Increases*; red: *PMBR Decreasers*). (B) Decay of the lag-1 autocorrelation from the first to the second half of the training session. (C) Directional variability decay from the first block (trials 1-25) to the learning plateau (trials 201-300). (D) Correlation coefficients over blocks for all individual subjects between the PMBR and the directional variability (left), trial-to-trial directional change (middle), and head movements (right). Grey asterisk indicates group correlations significantly different than zero. Black asterisk indicates significant difference in the correlation coefficients between the groups.

327

328 A third behavioural measure which can differentiate between learning mechanisms is the  
 329 decay in the intertrial variability over learning, which is a known feature of skill learning (Deutsch  
 330 and Newell, 2004; Müller and Sternad, 2004; Cohen and Sternad, 2009; Guo and Raymond, 2010;  
 331 Shmuelof et al., 2012; Huber et al., 2016; Sternad, 2018; Krakauer et al., 2019). The decay in the  
 332 intertrial variability (measured from the first block (trials 1-25) to the learning plateau (trials 201-  
 333 300)) was also significantly larger in the *PMBR Decreasers* (t-test  $p < 0.05$ , Figure 4C). We further

334 tested the link between the intertrial variability structure and the reported grouping by correlating  
335 the block-by-block directional variability and PMBR values within subjects. The *PMBR Increases*  
336 showed negative correlations over blocks between the PMBR and the directional variability, while  
337 the *PMBR Decreases* showed positive correlations, leading to a very significant difference  
338 between the groups (t-test  $p < 0.0001$ , [Figure 4D left](#)). The same trend was evident for the trial-to-  
339 trial directional changes (t-test  $p < 0.0001$ , [Figure 4D middle](#)). We also used the same correlation  
340 approach to control for head movements contamination of the PMBR dynamics. We looked for  
341 correlation over blocks between the PMBR and the peak head acceleration during the same time  
342 interval. Here we found no significant correlations for either of the groups ([Figure 4D right](#)), and  
343 most importantly, no difference between the groups (t-test  $p = 0.99$ ).

## 344 Discussion

345 In this paper, we detected brain activity signatures for motor learning in the complex real-  
346 world task of playing pool billiards. Our results produce new insights into motor learning by  
347 revealing two types of motor learners with different EEG dynamics in their PMBR over learning:  
348 *PMBR Increases* and *PMBR Decreases*. These groups were defined by their PMBR dynamic, and  
349 the grouping was validated over the correlation between the dynamics of their PMBR and their  
350 performance errors. While the groups showed no difference in the overall task performance – as  
351 measured by the directional errors of the ball – there were clear task-level differences between the  
352 groups in measures of skill learning which suggest differences in the underlying learning  
353 mechanisms.

354 The two known main mechanisms that drive motor learning – error-based learning and  
355 reward-based reinforcement learning – are engaging different neural processes (Doyon et al., 2003;  
356 e.g. Doyon and Benali, 2005; Uehara et al., 2018). While both mechanisms can contribute to  
357 learning in any given task, controlled laboratory-tasks are usually designed to induce the  
358 predominance of one mechanism over the other. In motor adaptation tasks the dominant mechanism  
359 is error-based learning, guided by an internal forward model which is updated based on sensory-  
360 prediction errors; while in tasks often addressed as skill-learning (such as sequence-learning, curve-  
361 tracking, and force-tracking) the dominant mechanism is reward-based learning where the  
362 controller learns from reinforcement of successful actions (Krakauer and Mazzoni, 2011; Haith and  
363 Krakauer, 2013). PMBR was reported to increase over learning in adaptation error-based learning  
364 tasks (e.g. Tan et al., 2014a, 2016; Torrecillos et al., 2015), showing negative correlations with the  
365 decreasing errors. On the other hand, in skill-learning tasks it was reported to decrease (itself or its  
366 magnetic resonance spectroscopy correlate) over the learning (e.g. Floyer-Lea et al., 2006;  
367 Kranczioch et al., 2008; Kolasinski et al., 2019). PMBR is positively correlated with magnetic  
368 resonance spectroscopy-measured GABA concentration (Gaetz et al., 2011; Cheng et al., 2017).

369 This may be due to the general correlation of Beta activity with GABAergic activity (Roopun et  
370 al., 2006; Yamawaki et al., 2008; Hall et al., 2010, 2011). We raise the possibility of a more nuanced  
371 link of GABA to motor learning: namely that the two diverging PMBR dynamics (increase vs.  
372 decrease) reflect that GABA activity is a distinguishing feature of different motor learning  
373 mechanisms. These may be reflections of GABAergic projections from different subcortical  
374 regions, cerebellum for error-based adaptation and basal ganglia for reward-based reinforcement  
375 learning (Doyon et al., 2003; Doyon and Benali, 2005).

376 Here, we found PMBR dynamic differences between groups of subjects performing the  
377 same task and explored it as a potential signature of motor learning mechanisms. In the data  
378 recorded during real-world motor learning in the current study, we found two groups of subjects:  
379 *PMBR Increasers* and *PMBR Decreasers*. The *PMBR Increasers* had low initial PMBR amplitudes  
380 and showed an increase over learning negatively correlated with the decreasing directional errors  
381 ( $r=-0.40\pm 0.26$ ). Following previous PMBR literature reported above, we presumed that these  
382 subjects used error-based adaptation as their dominant learning mechanism. The *PMBR Decreasers*  
383 had higher initial PMBR amplitudes and showed a decrease over learning positively correlated with  
384 the decreasing directional errors ( $r=0.47\pm 0.17$ ). Again, following previous PMBR literature, we  
385 presume that these subjects used reward-based learning as their dominant learning mechanism. As  
386 this mapping is highly speculative, we further explored the performance of the different groups in  
387 the task, looking for signatures of differences in the learning mechanisms in use. While the main  
388 text results are based on the PMBR over the left motor cortex (contralateral to the moving arm), we  
389 repeated the analysis over the right motor cortex (ipsilateral to the moving arm contralateral to the  
390 stabilizing arm). In line with previous literature showing similar PMBR trends between the two  
391 hemispheres (e.g., Jurkiewicz et al., 2006; Gaetz et al., 2010), the results over the right motor cortex  
392 (reported in the Supplementary Materials) replicated those of the left motor cortex, straightening  
393 the robustness of the different PMBR trends.

394 While there were no significant differences between the groups in their initial errors or  
395 their total learning, there was a clear group difference in the learning process. These behavioural  
396 differences can support the notion of differences in the predominant learning mechanism. First, we  
397 looked for group differences in the number of degrees of freedom of the body movement used while  
398 making the pool shot. Since the pioneering work of Nikolai Bernstein, who found that professional  
399 blacksmiths use high variability in their joint angles across repetitive trials to achieve low  
400 variability in their hammer trajectory endpoint, it is known that as skill evolves one learns to use  
401 more degrees of freedom in the movement (Bernstein, 1967). Using the full-body kinematics in this  
402 task from our previous study (Haar et al., 2019), we found that while over learning both groups  
403 learned to use more degrees of freedom in their movement, throughout the learning session there  
404 was a clear group difference where the *PMBR Increasers* used more degrees of freedom in their  
405 movement ([Figure 3D](#)).



406 We used the lag-1 autocorrelation (ACF(1)) as a second biomarker for the difference in the  
407 learning processes between the groups. ACF(1) was suggested as an index of skill learning, measuring  
408 the optimality of trial-by-trial motor planning (van Beers et al., 2013). ACF(1) of zero indicates  
409 optimal performance. What ACF(1) measures is the correlation between the errors in consecutive  
410 trials, and thus could be a good metric to dissociate between error-based adaptation (where we  
411 gradually decrease the error from one trial to the next) to reinforcement learning (where an error  
412 should lead to exploration). As expected for naïve participants, the ACF(1) values of both groups  
413 during both halves of the session were significantly greater than zero (Figure 4A). More  
414 importantly, while the *PMBR Increasers* showed no significant difference in the ACF(1) between  
415 the two halves of the session, the *PMBR Decreasers* showed a significant decay (Figure 4B). This  
416 decays difference is a behavioural indication for learning mechanism differences between the  
417 groups.

418 Third, the intertrial variability patterns were in line with the suggestion of different learning  
419 mechanisms. A decay in the intertrial variability a known feature of skill learning (Deutsch and  
420 Newell, 2004; Müller and Sternad, 2004; Cohen and Sternad, 2009; Guo and Raymond, 2010;  
421 Shmuelof et al., 2012; Huber et al., 2016; Sternad, 2018; Krakauer et al., 2019), but not of  
422 adaptation. Here, the *PMBR Decreasers* (presumably reward-based learners) showed more decay  
423 in their intertrial variability over learning (Figure 3B & Figure 4C). Additionally, the trial-to-trial  
424 directional changes over the first 4 blocks (100 trials) were much higher for the *PMBR Decreasers*  
425 than the *PMBR Increasers* group, suggesting that the first group used more exploration while the  
426 second made smaller changes from trial-to-trial (Figure 4C). This latter behaviour would be  
427 expected when learning predominantly by error-based adaptation.

428 Laboratory-tasks are usually designed to look or characterise a specific learning  
429 mechanism (which is being studied) for all subjects, using different types of feedback and  
430 perturbation manipulations (Huang et al., 2011; e.g. Galea et al., 2015; Kim et al., 2019). In  
431 contrast, the way we started to study real-world motor learning here, which mechanisms are used  
432 and to what extent is unknown a priori. However, we know that they probably involve multiple  
433 high- and low-level learning mechanisms (Krakauer and Mazzoni, 2011; Haith and Krakauer,  
434 2013), where different subjects might emphasize one learning modality over the other.

435 In our pool playing paradigm, subjects could have performed error-based adaptation as  
436 they learned from the directional error of the target ball in each trial, but they also could have  
437 performed reward-based learning as they learned a novel control policy to use the cue and their  
438 body joints while making a shot by reinforcement of successful actions. In the following, we will  
439 discuss how we could map the distinct groups of learners we discovered in our real-world task into  
440 the above learning frameworks (error-based and reward-based). We speculate that the group that  
441 showed the neural patterns which were previously reported in error-based motor adaptation (PMBR

442 increase, (Tan et al., 2014a, 2016)) and behavioural patterns of error-based adaptation (e.g. no  
443 decay in AFC, small decay in intertrial-variability, low trial-to-trial change) – probably used more  
444 error-based adaptation to adapt an existing motor control policy. At the same time, the group that  
445 showed neural patterns which were previously reported in reward-based motor skill learning  
446 (PMBR decrease, (Kranczioch et al., 2008)) and behavioural patterns of motor skill learning tasks  
447 (e.g. decay in AFC, decay in intertrial-variability, high trial-to-trial change) – probably used more  
448 reinforcement reward of successful actions for learning a new control policy.

449 We recently showed in a machine learning study how simultaneous reinforcement learning  
450 and error-based learning can efficiently be used to learn to control multi-joint muscle activities to  
451 learn to control an arm (Abramova et al., 2012, 2019). That work suggested when adaptation should  
452 occur: if a “similar enough” controller to achieve the task is already present (e.g. from other motor  
453 learning experiences) the existing controller is adapted then learning should have an error  
454 correction signature. In contrast, the absence of a suitable controller for the task either spawned the  
455 generation of a new controller or switching between multiple somewhat suitable controllers. We  
456 may see similar effects at work in this present human study for the two groups of learners. Thus,  
457 our real-world task merit further investigation not only in terms of the neuroscience of learning, but  
458 also in light of robot and machine learning algorithms that could explain the combination of these  
459 learning paradigms or even an entirely new process.

460 Recent studies suggest that event-related desynchronizations and synchronizations, such as  
461 PMBR, are driven by Beta bursts (Little et al., 2019; Seedat et al., 2020; Wessel, 2020) which carry  
462 more information than the trial-averaged band oscillation. At the same time, a recent study  
463 suggested spatial differences between Beta oscillations that reflect implicit and explicit learning  
464 (Jahani et al., 2020). These recent developments highlight the potential for capturing neural  
465 signatures of learning in EEG Beta. To further validate the current findings, future studies will need  
466 to compare the PMBR dynamics during learning of the same paradigm with different dominant  
467 mechanism, forced by experimental trickery (i.e. using feedback manipulations and constraints) in  
468 laboratory-tasks or real-world task in a virtual reality environment, where feedback manipulations  
469 can be applied (Haar et al., 2020).

470 The transition from a highly controlled lab-based task to a more ecological free-behaviour  
471 task introduces many challenges which led to a few limitations in the design. First, event-related  
472 EEG power changes are ideally normalized relative to a motion-free pre-movement baseline period.  
473 Since we were trying to keep the task as ecologically valid as possible, we choose not to force on  
474 the subjects a period of quiescence before each shot. Instead, we normalized relative to the average  
475 power. This follows a common normalization protocol in studies of PMBR during motor learning  
476 in lab-based tasks (Tan et al., 2014a, 2016; Torrecillos et al., 2015; Alayrangues et al., 2019). Since  
477 the same normalization was applied to all blocks of all subjects, we believe that the normalization

478 protocol could not have affected the within-subject PMBR trends in a way that would change the  
479 results. Second, movement has termination is also not perfectly defined, as subjects could follow  
480 through, or not. To address it, we used the ball-movement onset to define the movement offset and  
481 defined the PMBR based on the peak of the power in the following two seconds. Thus, even if the  
482 follow-through lasted a few hundred milliseconds, the PMBR was well within the window.

483 Finally, the results of the current study are correlational and cannot, by design, establish a  
484 causal role of PMBR in motor learning or motor learning causing PMBR. We propose, however,  
485 that going forward that brain stimulation at the Beta band can be used to manipulate the PMBR in  
486 order to infer causality (Pogosyan et al., 2009; Tan et al., 2014b; Herrmann et al., 2016). Similarly,  
487 differential studies with patient groups with evidence of an impaired Beta activity, such as  
488 Parkinson (Heinrichs-Graham et al., 2014), stroke (Rossiter et al., 2014), Autism Spectrum  
489 Disorder (Gaetz et al., 2020), or Schizophrenia (Robson et al., 2016), can also provide evidence for  
490 evaluating causality. We believe that our natural task approach here will be facilitating working  
491 with such patients' groups instead of using the artificially construed tasks of clinical settings.

## 492 **Conclusions**

493 In this mobile brain activity study in a pool playing task, we demonstrate the feasibility and  
494 importance of studying human neuroscience in-the-wild, and specifically in naturalistic real-world  
495 motor learning. We highlight that real-world motor learning involves different neural dynamics for  
496 different subjects, which were previously associated with different learning mechanisms in  
497 different tasks. Presumably, the individual subject's proportion of applying the two learning  
498 mechanisms could be revealed by the overall trend of the PMBR over learning. It suggests that real-  
499 world motor learning involves multi-modal learning mechanisms which subjects combine in new  
500 ways when faced with the complexity of learning in the real-world, and different subjects  
501 emphasize one mechanism over the other.

## 502 **References**

- 503 Abramova, E., Dickens, L., Kuhn, D., and Faisal, A. (2012). Hierarchical, Heterogeneous Control of Non-  
504 Linear Dynamical Systems using Reinforcement Learning. *J. Mach. Learn. Res.*
- 505 Abramova, E., Dickens, L., Kuhn, D., and Faisal, A. (2019). RLOC: Neurobiologically Inspired Hierarchical  
506 Reinforcement Learning Algorithm for Continuous Control of Nonlinear Dynamical Systems. *ArXiv*.  
507 Available at: <http://arxiv.org/abs/1903.03064> [Accessed April 29, 2020].
- 508 Alayrangues, J., Torrecillos, F., Jahani, A., and Malfait, N. (2019). Error-related modulations of the  
509 sensorimotor post-movement and foreperiod beta-band activities arise from distinct neural  
510 substrates and do not reflect efferent signal processing. *Neuroimage* 184, 10–24.  
511 doi:10.1016/j.neuroimage.2018.09.013.
- 512 Belić, J. J., and Faisal, A. A. (2015). Decoding of human hand actions to handle missing limbs in  
513 neuroprosthetics. *Front. Comput. Neurosci.* 9, 27. doi:10.3389/fncom.2015.00027.
- 514 Bernstein, N. (1967). *The co-ordination and regulation of movements*. Oxford: Pergamon Press.
- 515 Cheng, C. H., Tsai, S. Y., Liu, C. Y., and Niddam, D. M. (2017). Automatic inhibitory function in the human  
516 somatosensory and motor cortices: An MEG-MRS study. *Sci. Rep.* 7. doi:10.1038/s41598-017-04564-  
517 1.
- 518 Cohen, R. G., and Sternad, D. (2009). Variability in motor learning: relocating, channeling and reducing  
519 noise. *Exp. Brain Res.* 193, 69–83. doi:10.1007/s00221-008-1596-1.
- 520 Delorme, A., and Makeig, S. (2004). EEGLAB: an open source toolbox for analysis of single-trial EEG  
521 dynamics including independent component analysis. *J. Neurosci. Methods* 134, 9–21.  
522 doi:10.1016/J.JNEUMETH.2003.10.009.
- 523 Deutsch, K. M., and Newell, K. M. (2004). Changes in the structure of children’s isometric force variability  
524 with practice. *J. Exp. Child Psychol.* 88, 319–333. doi:10.1016/j.jecp.2004.04.003.
- 525 Doyon, J., and Benali, H. (2005). Reorganization and plasticity in the adult brain during learning of motor  
526 skills. *Curr. Opin. Neurobiol.* 15, 161–167. doi:10.1016/J.CONB.2005.03.004.
- 527 Doyon, J., Penhune, V., and Ungerleider, L. G. (2003). Distinct contribution of the cortico-striatal and  
528 cortico-cerebellar systems to motor skill learning. *Neuropsychologia* 41, 252–262.  
529 doi:10.1016/S0028-3932(02)00158-6.
- 530 Faisal, a A., Selen, L. P. J., and Wolpert, D. M. (2008). Noise in the nervous system. *Nat. Rev. Neurosci.* 9,  
531 292–303. doi:10.1038/nrn2258.
- 532 Floyer-Lea, A., Wylezinska, M., Kincses, T., and Matthews, P. M. (2006). Rapid Modulation of GABA  
533 Concentration in Human Sensorimotor Cortex During Motor Learning. *J. Neurophysiol.* 95, 1639–  
534 1644. doi:10.1152/jn.00346.2005.
- 535 Gaetz, W., Edgar, J. C., Wang, D. J., and Roberts, T. P. L. (2011). Relating MEG measured motor cortical  
536 oscillations to resting  $\gamma$ -Aminobutyric acid (GABA) concentration. *Neuroimage* 55, 616–621.  
537 doi:10.1016/J.NEUROIMAGE.2010.12.077.
- 538 Gaetz, W., MacDonald, M., Cheyne, D., and Snead, O. C. (2010). Neuromagnetic imaging of movement-  
539 related cortical oscillations in children and adults: Age predicts post-movement beta rebound.  
540 *Neuroimage* 51, 792–807. doi:10.1016/j.neuroimage.2010.01.077.
- 541 Gaetz, W., Rhodes, E., Bloy, L., Blaskey, L., Jackel, C. R., Brodtkin, E. S., et al. (2020). Evaluating motor  
542 cortical oscillations and age-related change in autism spectrum disorder. *Neuroimage* 207, 116349.  
543 doi:10.1016/j.neuroimage.2019.116349.
- 544 Galea, J. M., Mallia, E., Rothwell, J., and Diedrichsen, J. (2015). The dissociable effects of punishment and  
545 reward on motor learning. *Nat. Neurosci.* 18, 597–602. doi:10.1038/nn.3956.
- 546 Guo, C. C., and Raymond, J. L. (2010). Motor learning reduces eye movement variability through  
547 reweighting of sensory inputs. *J. Neurosci.* 30, 16241–16248. doi:10.1523/JNEUROSCI.3569-10.2010.
- 548 Haar, S., and Faisal, A. A. (2020). Neural biomarkers of multiple motor-learning mechanisms in a real-  
549 world task. *bioRxiv*, 2020.03.04.976951. doi:10.1101/2020.03.04.976951.

- 550 Haar, S., Givon-Mayo, R., Barmack, N. H., Yakhnitsa, V., and Donchin, O. (2015). Spontaneous Activity Does  
551 Not Predict Morphological Type in Cerebellar Interneurons. *J. Neurosci.* 35, 1432–1442.  
552 doi:10.1523/JNEUROSCI.5019-13.2015.
- 553 Haar, S., Sundar, G., and Faisal, A. A. (2020). Embodied virtual reality for the study of real-world motor  
554 learning. *bioRxiv*, 1–14. doi:10.1101/2020.03.19.998476.
- 555 Haar, S., van Assel, C. M., and Faisal, A. A. (2019). Kinematic signatures of learning that emerge in a real-  
556 world motor skill task. *bioRxiv*, 612218. doi:10.1101/612218.
- 557 Haith, A. M., and Krakauer, J. W. (2013). “Model-based and model-free mechanisms of human motor  
558 learning,” in *Progress in Motor Control. Advances in Experimental Medicine and Biology*, eds. M.  
559 Richardson, M. Riley, and K. Shockley (Springer, New York, NY), 1–21. doi:10.1007/978-1-4614-5465-  
560 6\_1.
- 561 Hall, S. D., Barnes, G. R., Furlong, P. L., Seri, S., and Hillebrand, A. (2010). Neuronal network  
562 pharmacodynamics of GABAergic modulation in the human cortex determined using pharmaco-  
563 magnetoencephalography. *Hum. Brain Mapp.* 31, 581–594. doi:10.1002/hbm.20889.
- 564 Hall, S. D., Stanford, I. M., Yamawaki, N., McAllister, C. J., Rönqvist, K. C., Woodhall, G. L., et al. (2011).  
565 The role of GABAergic modulation in motor function related neuronal network activity. *Neuroimage*  
566 56, 1506–1510. doi:10.1016/J.NEUROIMAGE.2011.02.025.
- 567 Heinrichs-Graham, E., Wilson, T. W., Santamaria, P. M., Heithoff, S. K., Torres-Russotto, D., Hutter-  
568 Saunders, J. A. L., et al. (2014). Neuromagnetic evidence of abnormal movement-related beta  
569 desynchronization in Parkinson’s disease. *Cereb. Cortex* 24. doi:10.1093/cercor/bht121.
- 570 Herrmann, C. S., Strüber, D., Helfrich, R. F., and Engel, A. K. (2016). EEG oscillations: From correlation to  
571 causality. *Int. J. Psychophysiol.* 103, 12–21. doi:10.1016/j.ijpsycho.2015.02.003.
- 572 Huang, V. S., Haith, A., Mazzoni, P., and Krakauer, J. W. (2011). Rethinking Motor Learning and Savings in  
573 Adaptation Paradigms: Model-Free Memory for Successful Actions Combines with Internal Models.  
574 *Neuron* 70, 787–801. doi:10.1016/J.NEURON.2011.04.012.
- 575 Huber, M. E., Brown, A. J., and Sternad, D. (2016). Girls can play ball: Stereotype threat reduces variability  
576 in a motor skill. *Acta Psychol. (Amst)*. 169, 79–87. doi:10.1016/j.actpsy.2016.05.010.
- 577 Jahani, A., Schwey, A., Bernier, P. M., and Malfait, N. (2020). Spatially Distinct Beta-Band Activities Reflect  
578 Implicit Sensorimotor Adaptation and Explicit Re-aiming Strategy. *J. Neurosci.* 40, 2498–2509.  
579 doi:10.1523/JNEUROSCI.1862-19.2020.
- 580 Jurkiewicz, M. T., Gaetz, W. C., Bostan, A. C., and Cheyne, D. (2006). Post-movement beta rebound is  
581 generated in motor cortex: Evidence from neuromagnetic recordings. *Neuroimage* 32, 1281–1289.  
582 doi:10.1016/J.NEUROIMAGE.2006.06.005.
- 583 Kendall, M. G. (1954). Note on Bias in the Estimation of Autocorrelation. *Biometrika* 41, 403.  
584 doi:10.2307/2332720.
- 585 Kim, H. E., Parvin, D. E., and Ivry, R. B. (2019). The influence of task outcome on implicit motor learning.  
586 *Elife* 8. doi:10.7554/eLife.39882.
- 587 Kolasinski, J., Hinson, E. L., Divanbeighi Zand, A. P., Rizov, A., Emir, U. E., and Stagg, C. J. (2019). The  
588 dynamics of cortical GABA in human motor learning. *J. Physiol.* 597, 271–282.  
589 doi:10.1113/JP276626.
- 590 Krakauer, J. W., Hadjiosif, A. M., Xu, J., Wong, A. L., and Haith, A. M. (2019). Motor learning. *Compr.*  
591 *Physiol.* 9, 613–663. doi:10.1002/cphy.c170043.
- 592 Krakauer, J. W., and Mazzoni, P. (2011). Human sensorimotor learning: Adaptation, skill, and beyond. *Curr.*  
593 *Opin. Neurobiol.* 21, 636–644. doi:10.1016/j.conb.2011.06.012.
- 594 Kranczioch, C., Athanassiou, S., Shen, S., Gao, G., and Sterr, A. (2008). Short-term learning of a visually  
595 guided power-grip task is associated with dynamic changes in EEG oscillatory activity. *Clin.*  
596 *Neurophysiol.* 119, 1419–1430. doi:10.1016/J.CLINPH.2008.02.011.
- 597 Little, S., Bonaiuto, J., Barnes, G., and Bestmann, S. (2019). Human motor cortical beta bursts relate to  
598 movement planning and response errors. *PLOS Biol.* 17, e3000479.  
599 doi:10.1371/journal.pbio.3000479.



- 600 Marriott, F. H. C., and Pope, J. A. (1954). Bias in the Estimation of Autocorrelations. *Biometrika* 41, 390.  
601 doi:10.2307/2332719.
- 602 Mognon, A., Jovicich, J., Bruzzone, L., and Buiatti, M. (2011). ADJUST: An automatic EEG artifact detector  
603 based on the joint use of spatial and temporal features. *Psychophysiology* 48, 229–240.  
604 doi:10.1111/j.1469-8986.2010.01061.x.
- 605 Müller, H., and Sternad, D. (2004). Decomposition of variability in the execution of goal-oriented tasks:  
606 three components of skill improvement. *J. Exp. Psychol. Hum. Percept. Perform.* 30, 212–233.  
607 doi:10.1037/0096-1523.30.1.212.
- 608 Palidis, D. J., Cashaback, J. G. A., and Gribble, P. L. (2019). Neural signatures of reward and sensory error  
609 feedback processing in motor learning. *J. Neurophysiol.* 121, 1561–1574.  
610 doi:10.1152/jn.00792.2018.
- 611 Pfurtscheller, G., Stancák, A., and Neuper, C. (1996). Post-movement beta synchronization. A correlate of  
612 an idling motor area? *Electroencephalogr. Clin. Neurophysiol.* 98, 281–293. doi:10.1016/0013-  
613 4694(95)00258-8.
- 614 Pogosyan, A., Gaynor, L. D., Eusebio, A., and Brown, P. (2009). Boosting Cortical Activity at Beta-Band  
615 Frequencies Slows Movement in Humans. *Curr. Biol.* 19, 1637–1641. doi:10.1016/j.cub.2009.07.074.
- 616 Robson, S. E., Brookes, M. J., Hall, E. L., Palaniyappan, L., Kumar, J., Skelton, M., et al. (2016). Abnormal  
617 visuomotor processing in schizophrenia. *NeuroImage Clin.* 12, 869–878.  
618 doi:10.1016/j.nicl.2015.08.005.
- 619 Roopun, A. K., Middleton, S. J., Cunningham, M. O., LeBeau, F. E. N., Bibbig, A., Whittington, M. A., et al.  
620 (2006). A beta2-frequency (20–30 Hz) oscillation in nonsynaptic networks of somatosensory cortex.  
621 *Proc. Natl. Acad. Sci. U. S. A.* 103, 15646–50. doi:10.1073/pnas.0607443103.
- 622 Rossiter, H. E., Boudrias, M.-H., and Ward, N. S. (2014). Do movement-related beta oscillations change  
623 after stroke? *J. Neurophysiol.* 112, 2053–2058. doi:10.1152/jn.00345.2014.
- 624 Seedat, Z. A., Quinn, A. J., Vidaurre, D., Liuzzi, L., Gascoyne, L. E., Hunt, B. A. E., et al. (2020). The role of  
625 transient spectral ‘bursts’ in functional connectivity: A magnetoencephalography study. *Neuroimage*  
626 209, 116537. doi:10.1016/J.NEUROIMAGE.2020.116537.
- 627 Shmuelof, L., Krakauer, J. W., and Mazzoni, P. (2012). How is a motor skill learned? Change and invariance  
628 at the levels of task success and trajectory control. *J. Neurophysiol.* 108, 578–594.  
629 doi:10.1152/jn.00856.2011.
- 630 Sternad, D. (2018). It’s not (only) the mean that matters: variability, noise and exploration in skill learning.  
631 *Curr. Opin. Behav. Sci.* 20, 183–195. doi:10.1016/J.COBEHA.2018.01.004.
- 632 Tan, H., Jenkinson, N., and Brown, P. (2014a). Dynamic Neural Correlates of Motor Error Monitoring and  
633 Adaptation during Trial-to-Trial Learning. *J. Neurosci.* 34, 5678–5688. doi:10.1002/slct.201800169.
- 634 Tan, H., Wade, C., and Brown, P. (2016). Post-Movement Beta Activity in Sensorimotor Cortex Indexes  
635 Confidence in the Estimations from Internal Models. *J. Neurosci.* 36, 1516–1528.  
636 doi:10.1523/JNEUROSCI.3204-15.2016.
- 637 Tan, H., Zavala, B., Pogosyan, A., Ashkan, K., Zrinzo, L., Foltynie, T., et al. (2014b). Human Subthalamic  
638 Nucleus in Movement Error Detection and Its Evaluation during Visuomotor Adaptation. *J. Neurosci.*  
639 34, 16744–16754. doi:10.1523/JNEUROSCI.3414-14.2014.
- 640 Torrecillos, F., Alayrangues, J., Kilavik, B. E., and Malfait, N. (2015). Distinct Modulations in Sensorimotor  
641 Postmovement and Foreperiod  $\beta$ -Band Activities Related to Error Salience Processing and  
642 Sensorimotor Adaptation. 35, 12753–12765. doi:10.1523/JNEUROSCI.1090-15.2015.
- 643 Uehara, S., Mawase, F., and Celnik, P. (2018). Learning Similar Actions by Reinforcement or Sensory-  
644 Prediction Errors Rely on Distinct Physiological Mechanisms. *Cereb. Cortex* 28, 3478–3490.  
645 doi:10.1093/cercor/bhx214.
- 646 van Beers, R. J. (2009). Motor Learning Is Optimally Tuned to the Properties of Motor Noise. *Neuron* 63,  
647 406–417. doi:10.1016/j.neuron.2009.06.025.
- 648 van Beers, R. J., van der Meer, Y., and Veerman, R. M. (2013). What Autocorrelation Tells Us about Motor  
649 Variability: Insights from Dart Throwing. *PLoS One* 8, e64332. doi:10.1371/journal.pone.0064332.

- 650 Wessel, J. R. (2020).  $\beta$ -Bursts Reveal the Trial-to-Trial Dynamics of Movement Initiation and Cancellation.  
651 *J. Neurosci.* 40, 411–423. doi:10.1523/JNEUROSCI.1887-19.2019.
- 652 Yamawaki, N., Stanford, I. M., Hall, S. D., and Woodhall, G. L. (2008). Pharmacologically induced and  
653 stimulus evoked rhythmic neuronal oscillatory activity in the primary motor cortex in vitro.  
654 *Neuroscience* 151, 386–395. doi:10.1016/J.NEUROSCIENCE.2007.10.021.
- 655 Zhang, Y., Wang, W., Zhang, X., and Li, Y. (2008). A cluster validity index for fuzzy clustering. *Inf. Sci. (Ny)*.  
656 178, 1205–1218. doi:10.1016/J.INS.2007.10.004.
- 657
- 658

## 659 Supplementary Material

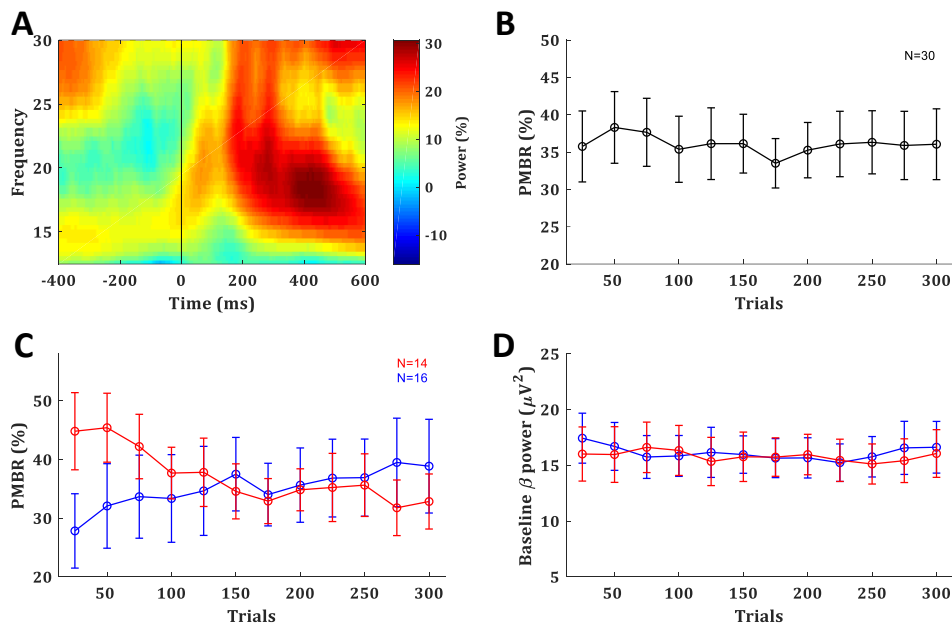

660

661 **Right Motor Cortex Post-movement beta rebound.** (A) Time-frequency map of a typical subject  
662 aligned to movement offset (ball movement onset), obtained by averaging the normalized power  
663 over electrode C4. (B) PMBR over blocks (of 25 trials), averaged across all subjects, error bars  
664 represent SEM. (C,D) PMBR (C) and Baseline beta power (D) of the PMBR Increases (blue) and  
665 PMBR Decreases (red) over blocks, averaged across all subjects in each group, error bars  
666 represent SEM.
